# Supplementary material for: ATG8 Is Essential Specifically for an Autophagy-Independent Function in Apicoplast Biogenesis in Blood-Stage Malaria Parasites
Source: PubMed Central journal article supplement (PMC5750400; doi:10.1128/mbio.02021-17), 2018-01-02
Supplement: mbo001183655sf3.pdf [file mbo001183655sf3.pdf]

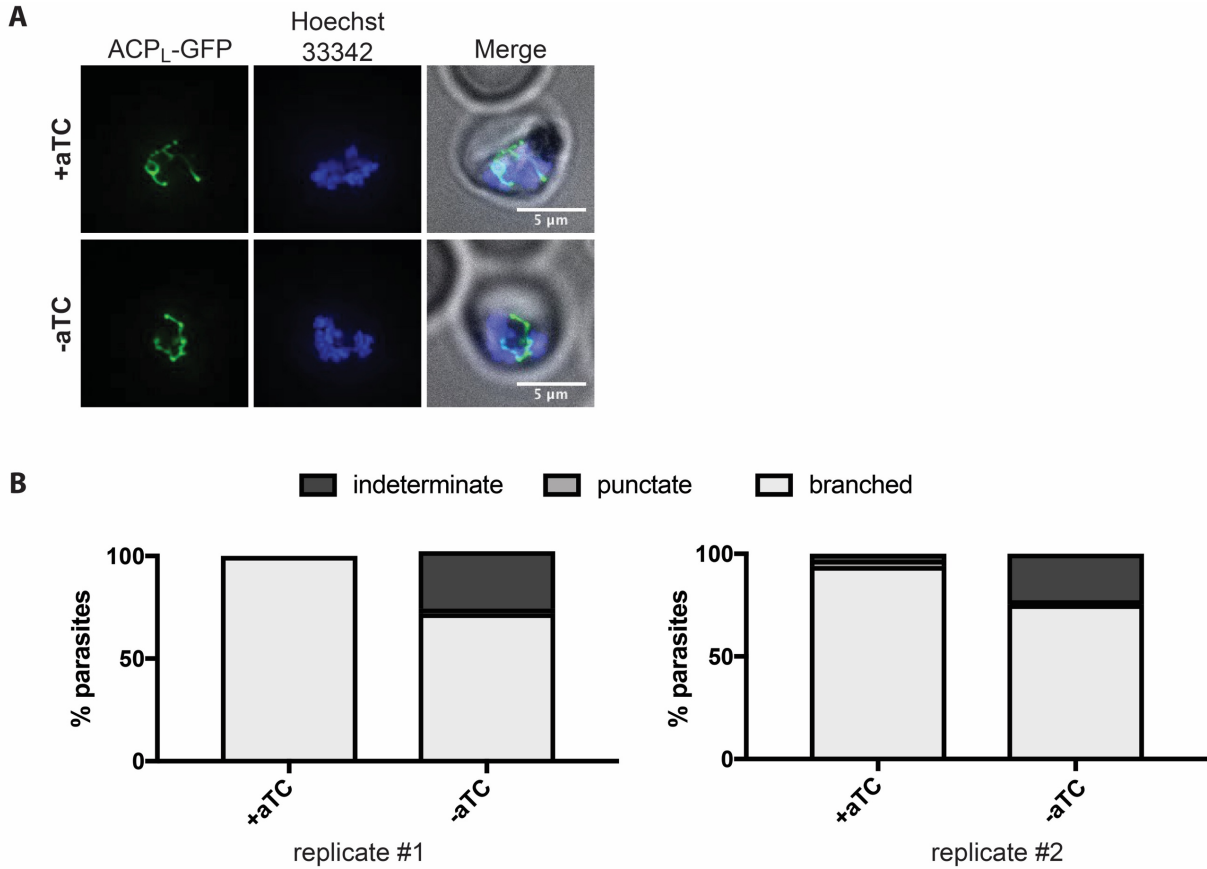

### Supplementary Figure S3

(A) Representative live images of ACP<sub>L</sub>-GFP expressing schizont stage parasites in the first cycle of ATG8 knockdown, i.e. approx. 32 hrs after aTC removal. Scale bar 5 μm. (B) Separate biological replicates of the experiment shown in Figure 3B. Thirteen and 43 parasites for replicate #1, and 34 and 55 parasites for replicate 2 were counted for +aTC and -aTC condition, respectively.
