# Supplementary material for: ATG8 Is Essential Specifically for an Autophagy-Independent Function in Apicoplast Biogenesis in Blood-Stage Malaria Parasites
Source: PubMed Central journal article supplement (PMC5750400; doi:10.1128/mbio.02021-17), 2018-01-02
Supplement: mbo001183655st1.pdf [file mbo001183655st1.pdf]

### Supplementary Table 1.

List of primers used in this study.

|                |                                                                          |                                             |
|----------------|--------------------------------------------------------------------------|---------------------------------------------|
| <b>SMG413</b>  | TTATTGGTTTTCAAACCTCATTGACTGTGCCCATTT<br>AGGTTATTTTATGACTCTTTGTC          | ATG8 Left homology region,<br>forward       |
| <b>SMG425</b>  | TTCCGTACGGCCCAAACAAGATTCACAGCTATATT<br>CCATATATAAATATCCATCTTCATC         | ATG8 Left homology region,<br>reverse       |
| <b>SMG411</b>  | GCATACATTATACGAAGTTATCGTAACTATAACAC<br>GCGCACACACACACACACAC              | ATG8 Right homology region<br>forward       |
| <b>SMG412</b>  | ATAGTGAGTCGTATTATTCGCTACCTTAGGACCGT<br>TGTGTATAAACACAAAATGAAGTATTATATATG | ATG8 Right homology region,<br>reverse      |
| <b>SMG454</b>  | TACACATGAATATATATTTTTTTGTGAGAG                                           | ATG8 Forward for checking 5'<br>integration |
| <b>SMG419</b>  | CTAAGGTAGCGAATAATACGACTCACTATAGGTAT<br>AGTTGTGAGAGTTGTCTGTTTTAGA         | ATG8 gRNA primer 1                          |
| <b>SMG420</b>  | CTAGCCTTATTTTAACTTGCTATTTCTAGCTCTAAA<br>ACAGACAACCTCTCACAACCTATAACC      | ATG8 gRNA primer 2                          |
| <b>SMG530</b>  | TAA TAT GAA TGA CAA AAA AGG AGA AAA TGA<br>AG                            | ATG8 For checking 3'<br>integration (P4)    |
| <b>MAWA059</b> | TTACAAAGTATCCTAGGATGAAGATCTTACTT<br>TGTATAATTTTTC                        | ACPL-GFP forward                            |
| <b>MAWA060</b> | TTTAATGGGGTACCCGCGGTTATTTGTATAGTTCAT<br>CCATGCCATGTG                     | ACPL-GFP reverse                            |
